# Supplementary material
Source: PubMed Central journal article supplement (PMC4640752)
Supplement: pnas.1424894112.sapp.pdf [file pnas.1424894112.sapp.pdf]

## Supplemental Information:

### Supplemental Results:

#### PKA and transcription factors in FLHCC

Upon stress in the endoplasmic reticulum, activation of IRE1 leads to cytoplasmic non-canonical splicing of the XBP1 transcript and subsequent transcriptional regulation by XBP1. PKA phosphorylation of IRE1a in the liver bypasses stress activation of this pathway (1). While characteristic splicing of the XBP1 mRNA was increased in several FLHCC samples, it was not increased in all and there were no consistent changes in XBP1 gene sets (c3.tft Broad Institute, Fig S1). PKA also phosphorylates the p65 subunit of NFκB. However, there was no significant correlation with changes of gene expression associated with NFκB, AP-2 or GATA-3.

#### Supplemental Methods

**qPCR:** We quantified the expression levels of several genes by quantitative RT-PCR (qPCR) (Fig 6A,B). Overall, qPCR fold-change (tumor vs. normal) values were very similar to those measured by RNA-Seq (Fig S4A,B,  $R^2=0.98$ ). Fold-change values for two genes tested by qPCR could not be quantitatively compared to RNA-Seq data due to lack of amplification in normal tissue samples, likely due to absence of gene expression. RNA-Seq reported an increase in the FLHCC tissue of 7.48 ( $\log_2$ ) fold for Rho GTPase activating protein 36 (ARHGAP36) and 4.54 ( $\log_2$ ) fold for EGF. By qPCR, we observed consistent amplification FLHCC tumor samples, but no amplification in the normal tissue. Thus, although a quantitative fold-change comparison was not possible, qPCR results suggest that qualitatively, these genes are strongly induced in FLHCC (as observed in the RNA-Seq analysis).

#### Western Blots

Fresh frozen tissue curls at 5  $\mu\text{m}$  were solubilized in RIPA buffer (Sigma) containing protease and phosphatase inhibitors (Complete EDTA-free and Phosphostop, Roche, Indianapolis, IN). Samples were normalized using protein concentration. These were then diluted with 4X NuPage LDS sample buffer (Life technologies) containing 10% beta-mercaptoethanol. Samples were heated at 100°C for 5 minutes, and then loaded on 4-12% Bis-Tris gels and run in MOPS buffer for 50 minutes at 200V. Transfer was performed using the iBlot (Life Technologies, Carlsbad, CA). The membranes were probed with primary antibodies in 5% milk against AKAP12, ZNF703, COL11A1 (abcam, ab49849, ab137054, ab166606, respectively, 1:500); EREG, AGR2 (Cell Signaling, #12048, #13062, respectively, 1:500); PRKACA (Santa Cruz Biotechnology, sc-903, 1:200); Beta-actin (Sigma, A5316, 1:2000) and incubated overnight. After washing in TBST, membranes were incubated with horseradish peroxidase-conjugated appropriate secondary antibodies (A9917, A0545, Sigma) in 5% milk at a concentration of 1:100,000, for 1 hour. Blots were then incubated with Amersham ECL prime western blotting detection reagent (GE Healthcare) or SuperSignal West Femto maximum sensitivity Substrate (Thermo Scientific, Rockford, IL).

#### Mass Spectrometry

Protein lysates were prepared from four patient replicates for each tumor and normal tissue. After removing detergent by chloroform/methanol precipitation (2), proteins were solubilized in 8M urea, cysteines reduced and alkylated with DTT/iodoacetamide, and digested with LysC (Wako Chemicals) followed by trypsin (Promega). After desalting [(3), 3  $\mu\text{g}$  of peptides were analyzed by nanoLC-MS/MS. Peptides were separated on a 50 cm EasySpray C18 column across 3 h gradients from 3 to 40% solvent B (A: 0.1% formic acid, B: 100% acetonitrile, 0.1% formic acid) and analyzed on a QExactive mass spectrometer (ThermoScientific).

Data were analyzed using MaxQuant (version 1.5.0.30) and Perseus software (version 1.5.0.9) (4), searching against a Uniprot human database (July 2014). Oxidation of methionine and protein N-terminal acetylation were allowed as variable modifications, and cysteine carbamidomethyl was set as a fixed modification. Two missed cleavages were allowed for specificity: Trypsin/P. The “match between runs” option was enabled. False discovery rates at the protein and PSM level were set to 1%. Protein abundances are expressed as LFQ (label free quantitation) values (5). Only proteins quantified in at least two out of three replicates in at least one group were retained, and missing values were imputed. A t-test test was performed and corrected for multiple-hypothesis testing using a permutation-based FDR with a threshold of 0.05.

## Supplemental References

1. Mao T, et al. (2011) PKA phosphorylation couples hepatic inositol-requiring enzyme 1 $\alpha$  to glucagon signaling in glucose metabolism. *Proceedings of the National Academy of Sciences of the United States of America* 108(38):15852-15857.
2. Langmead B & Salzberg SL (2012) Fast gapped-read alignment with Bowtie 2. *Nature methods* 9(4):357-359.
3. Dobin A, et al. (2013) STAR: ultrafast universal RNA-seq aligner. *Bioinformatics* 29(1):15-21.
4. Anders S, Pyl PT, & Huber W (2014) HTSeq-a Python framework to work with high-throughput sequencing data. *Bioinformatics*.
5. Love MI, Huber W, & Anders S (2014) Moderated estimation of fold change and dispersion for RNA-seq data with DESeq2. *Genome Biol.* 15(12):550.
6. Hänzelmann S, Castelo R, & Guinney J (2013) GSEA: gene set variation analysis for microarray and RNA-seq data. *BMC Bioinformatics* 14:7.
7. Smyth GK (2005) Limma: linear models for microarray data. eds Gentleman R, Carey VJ, Dudoit S, Irizarry R, & Huber W (Springer, New York), pp 397-420.
8. Law CW, Chen Y, Shi W, & Smyth GK (2014) voom: Precision weights unlock linear model analysis tools for RNA-seq read counts. *Genome Biol* 15(2):R29.
9. Wessel D & Flugge UI (1984) A method for the quantitative recovery of protein in dilute solution in the presence of detergents and lipids. *Anal Biochem* 138(1):141-143.
10. Rappsilber J, Ishihama Y, & Mann M (2003) Stop and go extraction tips for matrix-assisted laser desorption/ionization, nanoelectrospray, and LC/MS sample pretreatment in proteomics. *Anal Chem* 75(3):663-670.
11. Cox J & Mann M (2008) MaxQuant enables high peptide identification rates, individualized p.p.b.-range mass accuracies and proteome-wide protein quantification. *Nature biotechnology* 26(12):1367-1372.
12. Cox J, et al. (2014) Accurate proteome-wide label-free quantification by delayed normalization and maximal peptide ratio extraction, termed MaxLFQ. *Mol Cell Proteomics* 13(9):2513-2526.
13. Anders S & Huber W (2010) Differential expression analysis for sequence count data. *Genome Biol.* 11(10):R106.
14. Baselga J & Swain SM (2009) Novel anticancer targets: revisiting ERBB2 and discovering ERBB3. *Nature reviews. Cancer* 9(7):463-475.
15. Holland DG, et al. (2011) ZNF703 is a common Luminal B breast cancer oncogene that differentially regulates luminal and basal progenitors in human mammary epithelium. *EMBO molecular medicine* 3(3):167-180.
16. Zheng XQ, et al. (2013) Aurora-A is a determinant of tamoxifen sensitivity through phosphorylation of ER $\alpha$  in breast cancer. *Oncogene*.
17. Cabodi S, et al. (2010) p130Cas is an essential transducer element in ErbB2 transformation. *FASEB journal : official publication of the Federation of American Societies for Experimental Biology* 24(10):3796-3808.
18. Ebi H, et al. (2013) PI3K regulates MEK/ERK signaling in breast cancer via the Rac-GEF, P-Rex1. *Proceedings of the National Academy of Sciences* 110(52):21124-21129.
19. Johnston SRD & Dowsett M (2003) Aromatase inhibitors for breast cancer: lessons from the laboratory. *Nature reviews. Cancer* 3(11):821-831.
20. Moon J-S, et al. (2011) Krüppel-like factor 4 (KLF4) activates the transcription of the gene for the platelet isoform of phosphofructokinase (PFKP) in breast cancer. *The Journal of biological chemistry* 286(27):23808-23816.
21. McClelland ML, et al. (2013) Lactate dehydrogenase B is required for the growth of KRAS-dependent lung adenocarcinomas. *Clinical cancer research : an official journal of the American Association for Cancer Research* 19(4):773-784.

22. Reedijk M, et al. (2005) High-level coexpression of JAG1 and NOTCH1 is observed in human breast cancer and is associated with poor overall survival. *Cancer research* 65(18):8530-8537.
23. Myrthue A, et al. (2008) The iroquois homeobox gene 5 is regulated by 1,25-dihydroxyvitamin D3 in human prostate cancer and regulates apoptosis and the cell cycle in LNCaP prostate cancer cells. *Clinical cancer research : an official journal of the American Association for Cancer Research* 14(11):3562-3570.
24. Hoffman AE, Zheng T, Ba Y, & Zhu Y (2008) The circadian gene NPAS2, a putative tumor suppressor, is involved in DNA damage response. *Molecular cancer research : MCR* 6(9):1461-1468.
25. Stender JD, et al. (2011) The estrogen-regulated transcription factor PITX1 coordinates gene-specific regulation by estrogen receptor-alpha in breast cancer cells. *Mol. Endocrinol.* 25(10):1699-1709.
26. Vivekanandan P, Micchelli STL, & Torbenson M (2009) Anterior gradient-2 is overexpressed by fibrolamellar carcinomas. *Human pathology* 40(3):293-299.
27. Zenali MJ, Tan D, Li W, Dhingra S, & Brown RE (2010) Stemness characteristics of fibrolamellar hepatocellular carcinoma: immunohistochemical analysis with comparisons to conventional hepatocellular carcinoma. *Annals of clinical and laboratory science* 40(2):126-134.
28. Ross HM, et al. (2011) Fibrolamellar carcinomas are positive for CD68. *Modern pathology : an official journal of the United States and Canadian Academy of Pathology, Inc* 24(3):390-395.
29. Vasdev N & Nayak NC (2003) CD99 expression in hepatocellular carcinoma: an immunohistochemical study in the fibrolamellar and common variant of the tumour. *Indian journal of pathology & microbiology* 46(4):625-629.
30. Dhingra S, et al. (2010) Cell cycle biology of fibrolamellar hepatocellular carcinoma. *International journal of clinical and experimental pathology* 3(8):792-797.
31. Muramori K, et al. (2011) High aromatase activity and overexpression of epidermal growth factor receptor in fibrolamellar hepatocellular carcinoma in a child. *Journal of pediatric hematology/oncology* 33(5):e195-197.
32. Kannangai R, Vivekanandan P, Martinez-Murillo F, Choti M, & Torbenson M (2007) Fibrolamellar carcinomas show overexpression of genes in the RAS, MAPK, PIK3, and xenobiotic degradation pathways. *Human pathology* 38(4):639-644.
33. Agarwal VR, et al. (1998) Molecular basis of severe gynecomastia associated with aromatase expression in a fibrolamellar hepatocellular carcinoma. *The Journal of clinical endocrinology and metabolism* 83(5):1797-1800.
34. Hany MA, et al. (1997) A childhood fibrolamellar hepatocellular carcinoma with increased aromatase activity and a near triploid karyotype. *Medical and pediatric oncology* 28(2):136-138.
35. Cai L, et al. (1999) Endothelins and their receptors in cirrhotic and neoplastic livers of Canadian and Chinese populations. *Anticancer Res.* 19(3B):2243-2247.
36. Kannangai R, Sahin F, & Torbenson MS (2006) EGFR is phosphorylated at Ty845 in hepatocellular carcinoma. *Mod. Pathol.* 19(11):1456-1461.
37. Buckley AF, Burgart LJ, Sahai V, & Kakar S (2008) Epidermal growth factor receptor expression and gene copy number in conventional hepatocellular carcinoma. *Am. J. Clin. Pathol.* 129(2):245-251.
38. Muramori K, et al. (2011) High aromatase activity and overexpression of epidermal growth factor receptor in fibrolamellar hepatocellular carcinoma in a child. *Journal of pediatric hematology/oncology* 33(5):e195-197.
39. Teitelbaum DH, Tuttle S, Carey LC, & Clausen KP (1985) Fibrolamellar carcinoma of the liver. Review of three cases and the presentation of a characteristic set of tumor markers defining this tumor. *Ann. Surg.* 202(1):36-41.
40. Berman MA, Burnham JA, & Sheahan DG (1988) Fibrolamellar carcinoma of the liver: an immunohistochemical study of nineteen cases and a review of the literature. *Human pathology* 19(7):784-794.

41. Shafizadeh N, Ferrell LD, & Kakar S (2008) Utility and limitations of glypican-3 expression for the diagnosis of hepatocellular carcinoma at both ends of the differentiation spectrum. *Modern pathology : an official journal of the United States and Canadian Academy of Pathology, Inc* 21(8):1011-1018.
42. Jagirdar J, Nonomura A, Patil J, Thor A, & Paronetto F (1989) ras oncogene p21 expression in hepatocellular carcinoma. *J. Exp. Pathol.* 4(1):37-46.
43. Collier NA, et al. (1984) Neurotensin secretion by fibrolamellar carcinoma of the liver. *Lancet* 1(8376):538-540.
44. Read D, Shulkes A, Fernley R, & Simpson R (1991) Characterization of neurotensin(6-13) from an hepatic fibrolamellar carcinoma. *Peptides* 12(4):887-892.
45. Ehrenfried JA, Zhou Z, Thompson JC, & Evers BM (1994) Expression of the neurotensin gene in fetal human liver and fibrolamellar carcinoma. *Ann. Surg.* 220(4):484-489- discussion 489-491.
46. Malouf GG, et al. (2014) Transcriptional profiling of pure fibrolamellar hepatocellular carcinoma reveals an endocrine signature. *Hepatology*.
47. Sheppard KJ, Bradbury DA, Davies JM, & Ryrie DR (1983) High serum vitamin B12 binding capacity as a marker of the fibrolamellar variant of hepatocellular carcinoma. *Br Med J (Clin Res Ed)* 286(6358):57.
48. Wheeler K, Pritchard J, Luck W, & Rossiter M (1986) Transcobalamin I as a "marker" for fibrolamellar hepatoma. *Medical and pediatric oncology* 14(4):227-229.
49. Lildballe DL, Nguyen KQ, Poulsen SS, Nielsen HO, & Nexø E (2011) Haptocorrin as marker of disease progression in fibrolamellar hepatocellular carcinoma. *European journal of surgical oncology : the journal of the European Society of Surgical Oncology and the British Association of Surgical Oncology* 37(1):72-79.
50. Orsatti G, Hytioglou P, Thung SN, Ishak KG, & Paronetto F (1997) Lamellar fibrosis in the fibrolamellar variant of hepatocellular carcinoma: a role for transforming growth factor beta. *Liver* 17(3):152-156.

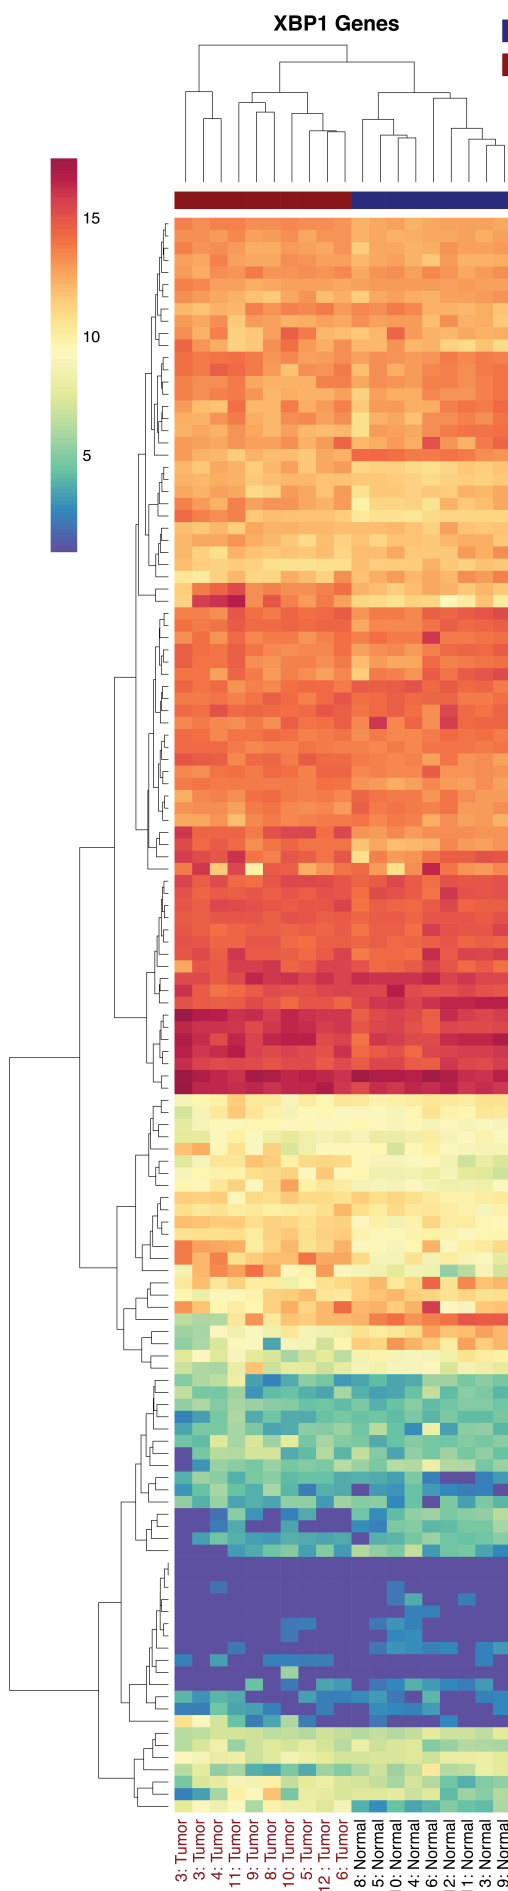

■ Normal  
■ Tumor

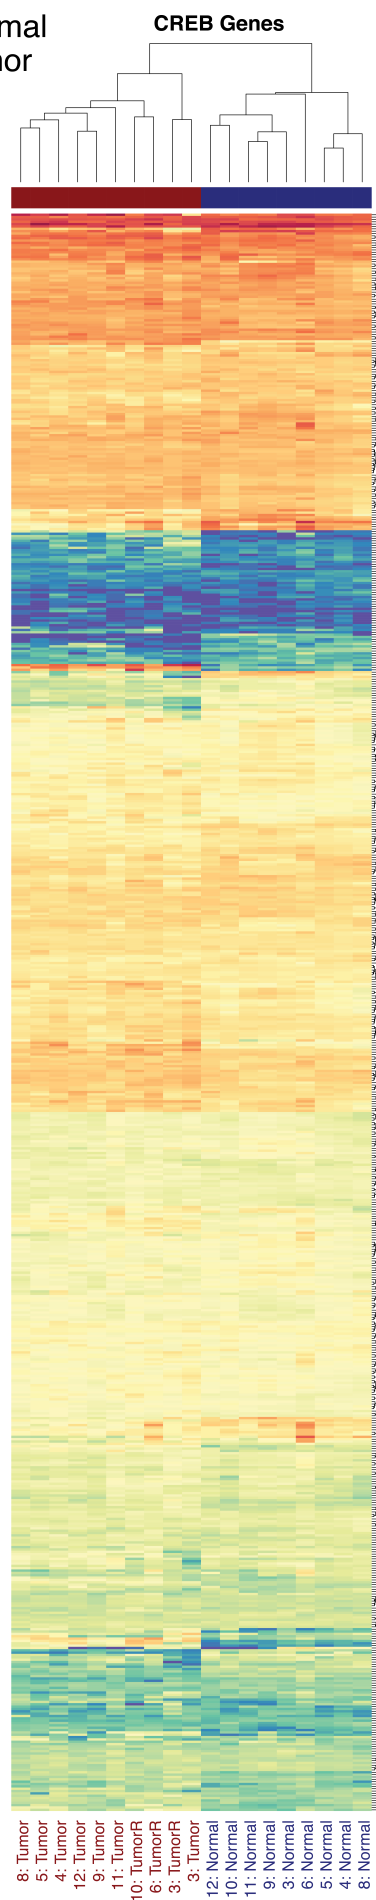

**Supplemental Figure 1:  
Gene level heat maps  
for XBP1 and CREB  
transcription factor  
target gene sets**

Variance stabilization transformed expression values for genes in XBP1 (left) and CREB (right) transcription factor target gene sets (MSigDB, c3.tft). Gene lists were generated by concatenating and collapsing all gene sets in c3.tft collection designated XBP1 and CREB, respectively. FLHCC (maroon), normal (blue).

**Supplemental Figure 2: Gene expression differences in FLHCC vs. normal liver tissue for KEGG Wnt signaling pathway gene set.** For genes in KEGG Wnt signaling pathway gene set,  $\log_2$  fold-change (patient-matched FL-HCC vs. normal liver) expression is plotted with heatmap color scale. Genes significantly differentially expressed (FDR 0.01,  $\log_2$  fold-change > 1) are indicated in **BOLD**.

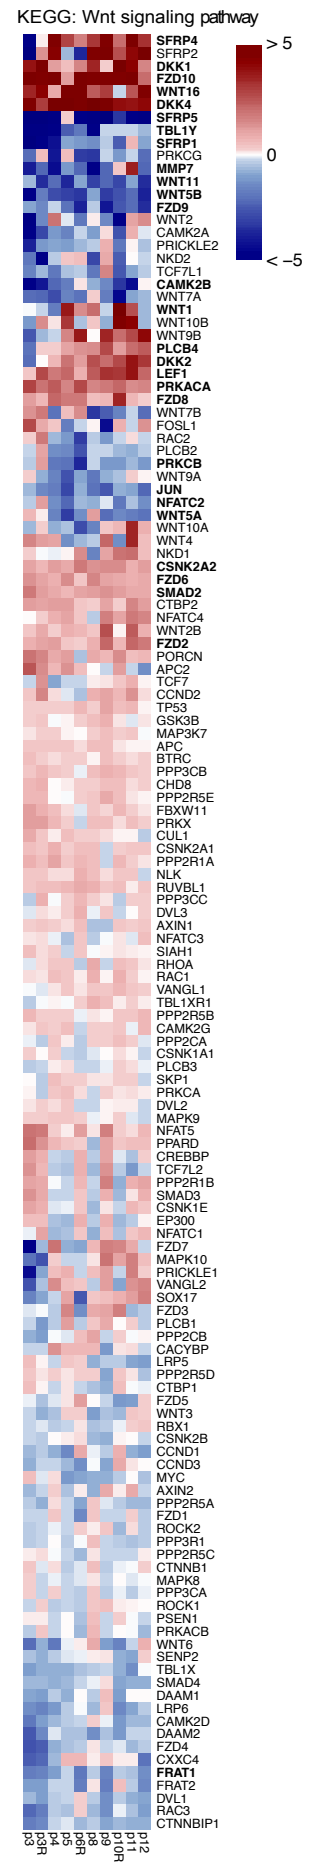

### Supplemental Figure 3.

Gene expression differences in FLHCC vs. normal liver tissue for select KEGG pathway cancer gene sets. For all genes in each collection,  $\log_2$  fold-change (patient-matched FLHCC vs. normal liver) expression is plotted with heatmap color scale. Genes significantly differentially expressed (FDR 0.01,  $\log_2$  fold-change > 1) are indicated in **BOLD**. A. Small Cell Lung Cancer (KEGG, GSVA adjusted p value = 0.045), B. Pancreatic Cancer (KEGG, GSVA adjusted p value = 0.046), C. Bladder Cancer (KEGG, GSVA adjusted p value = 0.003).

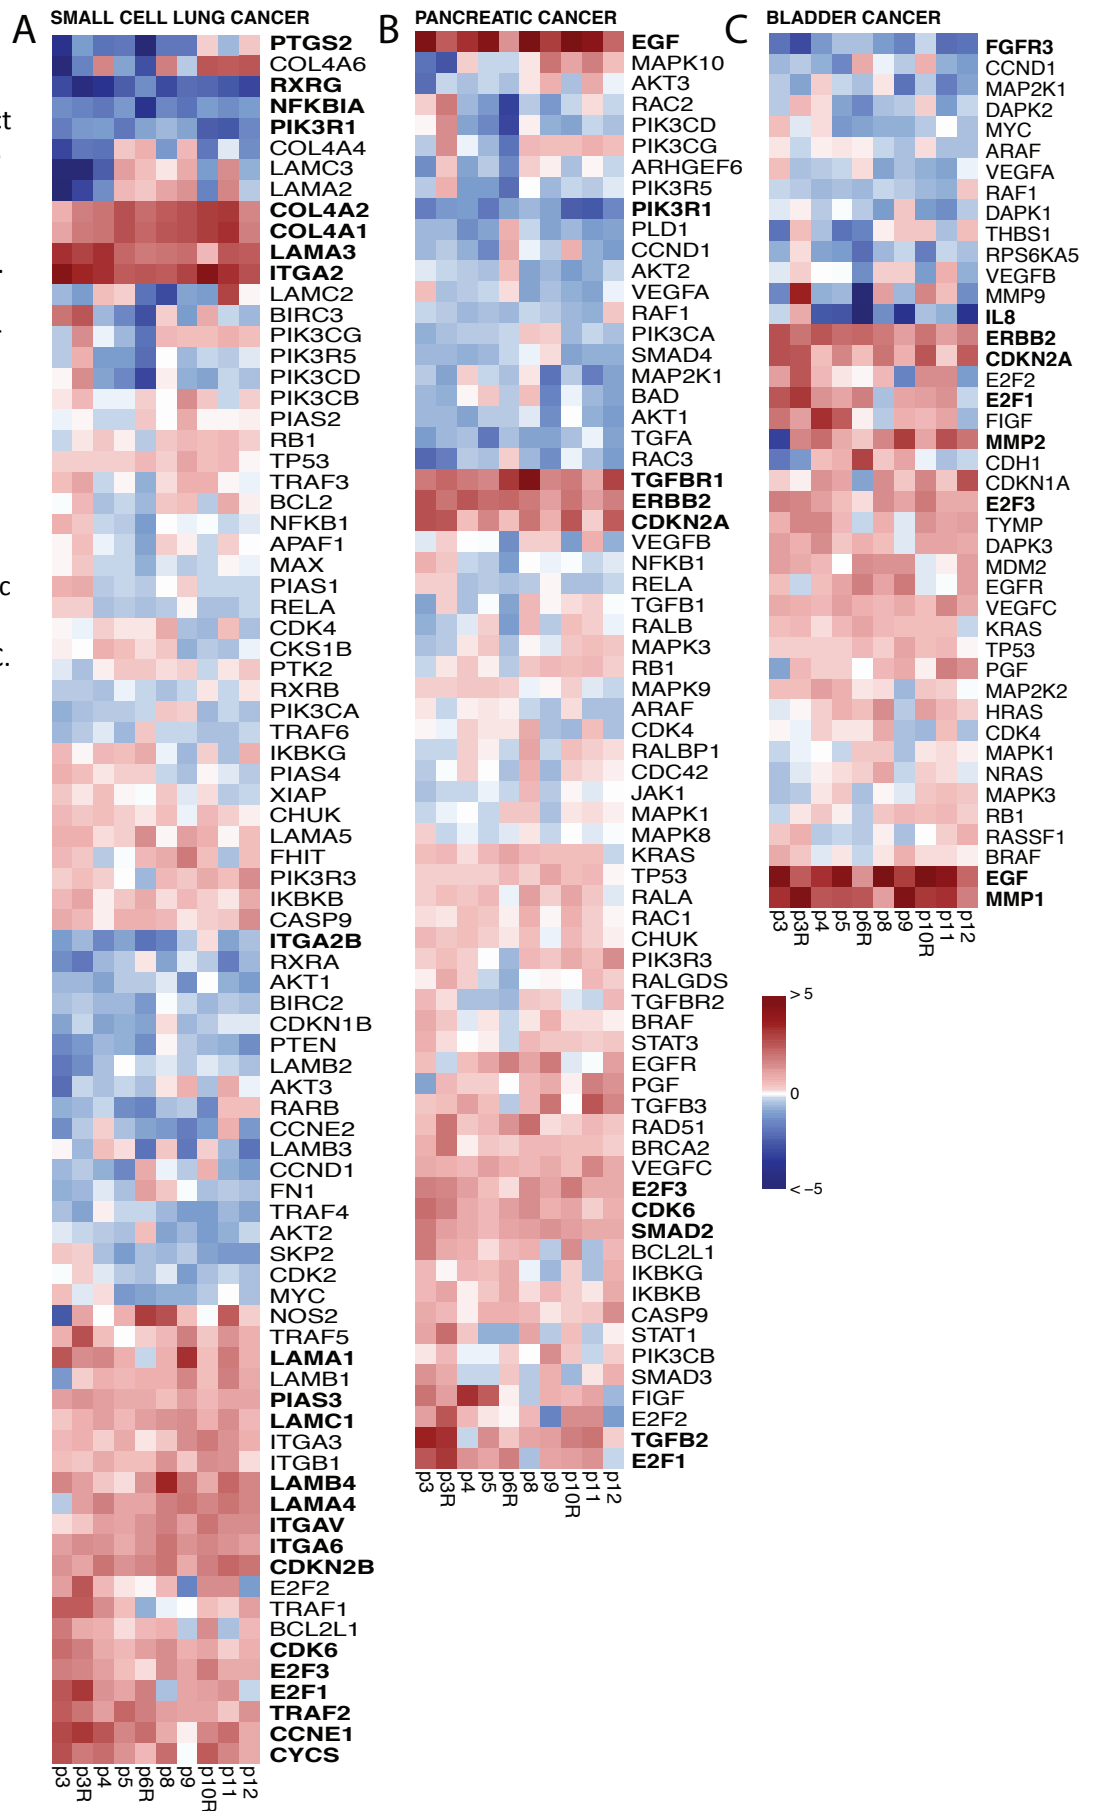

**Supplemental Figure 4: A.** The transcriptional changes as assayed by RNA-seq (n=10) were correlated with transcriptional changes as assayed by qPCR as shown in Fig 6A (n= 5-8; error bars=SD). Scatter plot showing the correlation of the results ( $R^2=0.98$ ). **B.** Transcriptional changes as assayed by RNA-seq (n=10) were correlated with changes in the proteome as assayed by mass spectrometry (n=4) as shown in Figure 6B. Scatter plot showing the correlation of the results ( $R^2=0.68$ ).

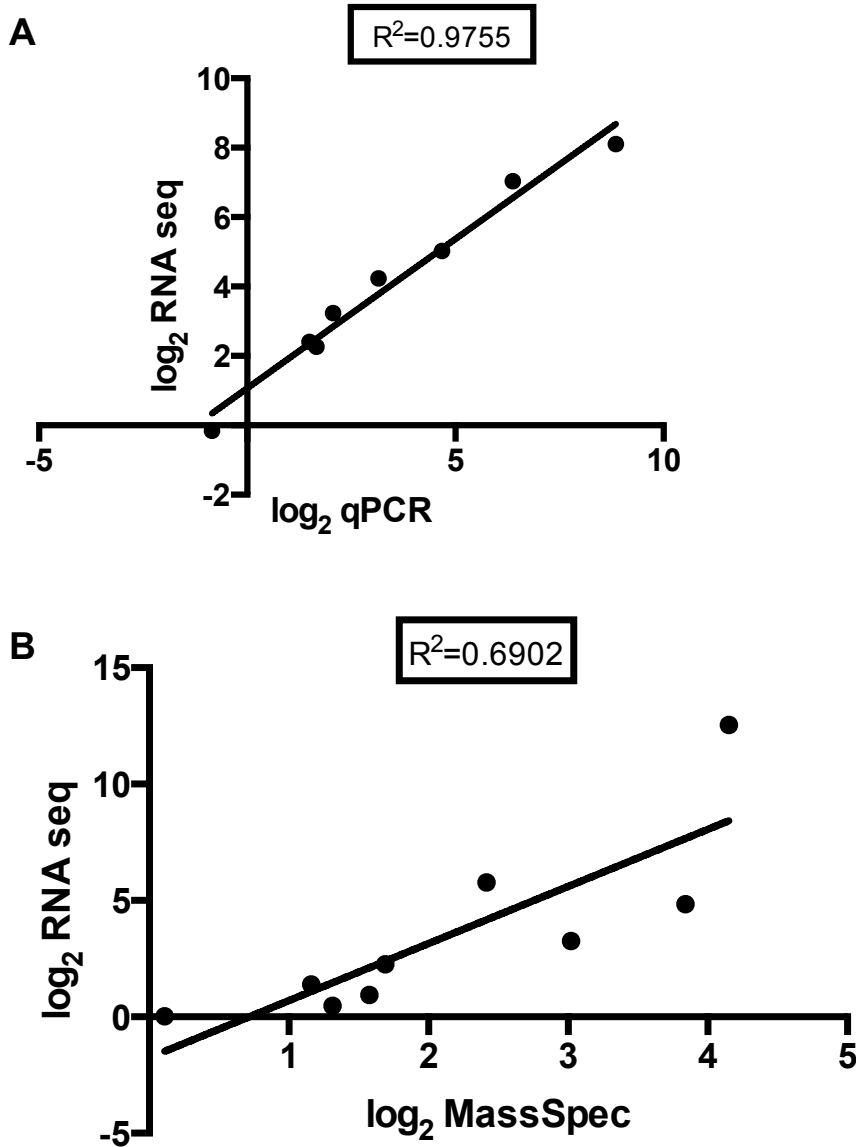



## Excel Spreadsheet:

**Data Set 1, Differentially expressed protein-coding genes, FLHCC vs. normal tissue:** DESeq2 (6) was used with transcript annotations from GENCODE v74 to examine protein-coding genes in FLHCC versus adjacent normal tissue. Using an FDR threshold of 0.01 and a fold-change threshold of 2, we detected 3439 protein-coding genes differentially expressed (1408 upregulated, 2031 downregulated).

**Data Set 2, Canonical Pathway gene sets with positive enrichment:** Gene set variation analysis (GSVA) was used to identify significantly enriched pathway gene sets (7). Among these sets of “Canonical Pathways” in the Molecular Signatures Database (Broad institute, c2.cp), we identified 205 pathway gene sets positively enriched in FLHCC vs. normal (adj P val  $\leq$  0.05).

**Data Set 3, Canonical Pathway gene sets with negative enrichment:** Gene set variation analysis (GSVA) was used to identify significantly enriched pathway gene sets Among these sets of “Canonical Pathways” in the Molecular Signatures Database (Broad institute, c2.cp), we identified 159 pathway gene sets negatively enriched in FLHCC vs. normal (adj P val  $\leq$  0.05).

**Data Set 4: Differences in gene expression changes: FLHCC vs HCC, tumor vs. normal.**

Differential expression analysis of the differences in FLHCC (tumor vs. normal) to differences in HCC (tumor vs. normal). Using an FDR threshold of 0.01 and a fold-change threshold of 2, we detected 3708 protein-coding genes as differentially induced or repressed between tumor types.

**Supplemental Table 1 Differentially expressed collagen genes in FLHCC vs adjacent normal tissue.** FDR 0.01,  $\log_2$ fold-change  $\geq$  1 or  $\leq$  -1.

**Supplemental Table 2 Differentially expressed fibronectin genes in FLHCC vs adjacent normal tissue.** FDR 0.01,  $\log_2$ fold-change  $\geq$  1 or  $\leq$  -1.

**Supplemental Table 3: Differentially expressed keratin genes in FLHCC vs adjacent normal tissue.** FDR 0.01,  $\log_2$ fold-change  $\geq$  1 or  $\leq$  -1.

**Supplemental Table 4: Differentially expressed cell-cell interactions genes in FLHCC vs adjacent normal tissue.** FDR 0.01,  $\log_2$ fold-change  $\geq$  1 or  $\leq$  -1.)

**Supplemental Table 5: Transcription factor target gene sets (MSigDB, c3.tft) with positive enrichment.** GSVA analysis, adj P val  $\leq$  0.05.

**Supplemental Table 6: Transcription factor target gene sets (MSigDB, c3.tft) with negative enrichment.** GSVA analysis, adj P val  $\leq$  0.05.

**Supplemental Table 7: Differential expression of NRG2 in FLHCC vs adjacent normal tissue in nine tumor samples** GSVA analysis, adj P val  $\leq$  0.05.

**Supplemental Table 8: Differentially expressed Solute Transporter genes in FLHCC vs. normal tissue.** GSVA analysis, adj P val  $\leq$  0.05.

**Supplement Table 9: Different expressed *wnt* signaling pathway genes in FLHCC vs. adjacent normal tissue** GSVA analysis, adj P val  $\leq$  0.05.

**Supplemental Table 10: Transcription factors increased by more than 2-fold** adj P val  $\leq$  0.02

**Supplemental Table 11: Transcription factors decreased by more than 2-fold** adj P val  $\leq$  0.02

**Supplemental Table 12: Transcripts differentially expressed in FLHCC correlated with Kegg Cancer Pathways sets** Among gene sets from the “Canonical Pathways” collection in the Molecular Signatures Database (Broad institute, c2.cp), found to be differentially enriched (GSVA, FDR 0.05) in FL-HCC versus normal tissue were three “cancer sets” from the KEGG collection: bladder cancer, pancreatic cancer and small cell lung cancer.

**Supplemental Table 13: Differential expression of breast cancer associated genes in FLHCC vs adjacent normal tissue.**

**Supplemental Table 14: Comparison with previous reports on FLHCC.** Previous studies of proteomics or transcriptomics of FLHCC have previously reported candidates altered in FHLCC. These previous reports were compared with the results of the gene expression profiles in this study.

**Supplemental Table 15: Primers used for qPCR.**

**Supplemental Table 1 Differentially expressed collagen genes in FLHCC vs adjacent normal tissue. FDR 0.01, log<sub>2</sub>fold-change ≥ 1 or ≤ -1**

| Gene                         | Name    | ΔLog <sub>2</sub> | pAdj     |
|------------------------------|---------|-------------------|----------|
| collagen, type I, alpha 1    | COL1A1  | 3.13              | 9.11E-08 |
| collagen, type I, alpha 2    | COL1A2  | 2.51              | 8.55E-06 |
| collagen, type III, alpha 1  | COL3A1  | 1.47              | 2.22E-02 |
| collagen, type IV, alpha 1   | COL4A1  | 2.61              | 1.07E-35 |
| collagen, type IV, alpha 2   | COL4A2  | 2.51              | 2.36E-27 |
| collagen, type V, alpha 1    | COL5A1  | 1.72              | 6.47E-04 |
| collagen, type V, alpha 2    | COL5A2  | 1.45              | 4.88E-03 |
| collagen, type V, alpha 3    | COL5A3  | 1.42              | 1.37E-07 |
| collagen, type VI, alpha 3   | COL6A3  | 1.69              | 1.67E-04 |
| collagen, type VI, alpha 5   | COL6A5  | 3.46              | 2.56E+04 |
| collagen, type VIII, alpha 1 | COL8A1  | 3.35              | 3.85E-07 |
| collagen, type IX, alpha 1   | COL9A1  | 2.78              | 2.03E-05 |
| collagen, type X, alpha 1    | COL10A1 | 4.39              | 7.88E-09 |
| collagen, type XI, alpha 1   | COL11A1 | 6.95              | 1.05E-32 |
| collagen, type XV, alpha 1   | COL15A1 | 4.12              | 1.44E-28 |
| collagen, type XVII, alpha 1 | COL17A1 | 2.27              | 6.04E-04 |
| collagen, type XXII, alpha 1 | COL22A1 | 2.32              | 6.76E-06 |

**Supplemental Table 2 Differentially expressed fibronectin genes in FLHCC vs adjacent normal tissue. FDR 0.01, log<sub>2</sub>fold-change ≥ 1 or ≤ -1.**

| Name                                                   | Gene ID | ΔLog <sub>2</sub> | pAdj     |
|--------------------------------------------------------|---------|-------------------|----------|
| fibronectin 1                                          | FN1     | -0.24             | 3.88E-01 |
| fibronectin leucine rich transmembrane protein 1       | FLRT1   | -2.69             | 2.57E-03 |
| fibronectin leucine rich transmembrane protein 2       | FLRT2   | -0.21             | 8.20E-01 |
| fibronectin leucine rich transmembrane protein 3       | FLRT3   | 0.95              | 1.79E-02 |
| fibronectin type III and ankyrin repeat domains 1      | FANK1   | 0.88              | 3.18E-02 |
| fibronectin type III and SPRY domain containing 1      | FSD1    | -0.99             | 5.50E-02 |
| fibronectin type III and SPRY domain containing 1-like | FSD1L   | 1.34              | 8.22E-12 |
| fibronectin type III and SPRY domain containing 2      | FSD2    | -1.19             | 1.13E-01 |
| fibronectin type III domain containing 1               | FNDC1   | 2.64              | 2.90E-04 |
| fibronectin type III domain containing 3A              | FNDC3A  | 1.22              | 6.53E-06 |
| fibronectin type III domain containing 3B              | FNDC3B  | -0.35             | 2.72E-02 |
| fibronectin type III domain containing 4               | FNDC4   | 0.57              | 1.11E-02 |
| fibronectin type III domain containing 5               | FNDC5   | -3.73             | 2.20E-09 |
| fibronectin type III domain containing 7               | FNDC7   | 0.73              | 1.85E-01 |
| fibronectin type III domain containing 8               | FNDC8   | 0.56              | NA       |
| fibronectin type III domain containing 9               | FNDC9   | 1.86              | 1.77E-01 |

**Supplemental Table 3: Differentially expressed keratin genes in FLHCC vs adjacent normal tissue. FDR 0.01, log<sub>2</sub>fold-change ≥ 1 or ≤ -1**

| name        | Gene   | ΔLog <sub>2</sub> | pAdj     |
|-------------|--------|-------------------|----------|
| keratin 1   | KRT1   | -3.15             | 6.56E-04 |
| keratin 19  | KRT19  | -2.71             | 9.49E-04 |
| keratin 222 | KRT222 | 2.44              | 7.48E-14 |
| keratin 7   | KRT7   | 4.08              | 5.95E-10 |
| keratin 72  | KRT72  | -2.61             | 9.80E-03 |
| keratin 73  | KRT73  | -3.10             | 7.82E-03 |
| keratin 81  | KRT81  | 3.43              | 2.90E-04 |
| keratin 83  | KRT83  | 4.08              | 1.31E-02 |
| keratin 86  | KRT86  | 5.02              | 8.65E-15 |

**Supplemental Table 4: Differentially expressed cell-cell interactions genes in FLHCC vs adjacent normal tissue. FDR 0.01, log<sub>2</sub>fold-change ≥ 1 or ≤ -1.)**

| Gene                                          | Name  | ΔLog <sub>2</sub> | Padj     |
|-----------------------------------------------|-------|-------------------|----------|
| gap junction protein, gamma 1, 45kDa          | GJC1  | 2.38              | 1.59E-31 |
| gap junction protein, alpha 5, 40kDa          | GJA5  | 2.41              | 4.92E-12 |
| integrin, alpha 7                             | ITGA7 | 2.30              | 1.54E-16 |
| integrin, alpha 5                             | ITGAV | 1.36              | 1.99E-12 |
| roundabout, axon guidance receptor, homolog 1 | ROBO1 | 1.30              | 2.03E-06 |
| slit homolog 2 (Drosophila)                   | SLIT2 | 1.88              | 1.31E-08 |
| jagged 1                                      | JAG1  | 1.19              | 9.31E-07 |
| Cadherin-13                                   | CDH13 | 2.90              | 6.27E-25 |
| Cluster of Differentiation 90                 | THY1  | 3.07              | 2.33E-18 |

**Supplemental Table 5: Transcription factor target gene sets (MSigDB, c3.tft) with positive enrichment. GSVA analysis, adj P val ≤ 0.05.**

| Gene sets             | logFC | AveExpr | t     | P.Value  | adj.P.Val | B      | FC   | FC base 10 |
|-----------------------|-------|---------|-------|----------|-----------|--------|------|------------|
| V\$HTF_01             | 0.597 | -0.011  | 6.706 | 2.10E-11 | 1.29E-08  | 15.487 | 1.51 | 3.95       |
| CGGAARNGGCNG_UNKNOWN  | 0.468 | -0.030  | 5.256 | 1.50E-07 | 2.31E-05  | 7.017  | 1.38 | 2.93       |
| V\$EVI1_01            | 0.424 | 0.021   | 4.764 | 1.92E-06 | 2.36E-04  | 4.613  | 1.34 | 2.65       |
| V\$MEF2_04            | 0.405 | 0.020   | 4.556 | 5.28E-06 | 5.19E-04  | 3.664  | 1.32 | 2.54       |
| SNACANNYSYAGA_UNKNOWN | 0.403 | -0.051  | 4.532 | 5.91E-06 | 5.19E-04  | 3.558  | 1.32 | 2.53       |
| CYTAGCAAY_UNKNOWN     | 0.398 | -0.039  | 4.471 | 7.85E-06 | 6.03E-04  | 3.292  | 1.32 | 2.50       |
| YRTCANNRCGC_UNKNOWN   | 0.373 | -0.051  | 4.194 | 2.76E-05 | 1.70E-03  | 2.119  | 1.30 | 2.36       |
| V\$PAX3_01            | 0.363 | -0.031  | 4.082 | 4.49E-05 | 2.51E-03  | 1.667  | 1.29 | 2.31       |
| GAANYNYGACNY_UNKNOWN  | 0.358 | -0.036  | 4.027 | 5.70E-05 | 2.92E-03  | 1.447  | 1.28 | 2.28       |
| V\$AR_03              | 0.352 | 0.007   | 3.962 | 7.47E-05 | 3.10E-03  | 1.196  | 1.28 | 2.25       |
| V\$AP1_Q6_01          | 0.352 | -0.003  | 3.954 | 7.75E-05 | 3.10E-03  | 1.163  | 1.28 | 2.25       |
| V\$XBP1_01            | 0.350 | -0.058  | 3.931 | 8.53E-05 | 3.10E-03  | 1.075  | 1.27 | 2.24       |
| TMTCGCGANR_UNKNOWN    | 0.350 | -0.045  | 3.929 | 8.58E-05 | 3.10E-03  | 1.068  | 1.27 | 2.24       |
| V\$HSF1_01            | 0.347 | -0.001  | 3.902 | 9.60E-05 | 3.28E-03  | 0.965  | 1.27 | 2.22       |
| CRGAARNNNCGA_UNKNOWN  | 0.343 | -0.068  | 3.859 | 1.14E-04 | 3.65E-03  | 0.804  | 1.27 | 2.20       |
| V\$TCF11MAFG_01       | 0.342 | -0.037  | 3.850 | 1.19E-04 | 3.65E-03  | 0.767  | 1.27 | 2.20       |
| V\$PAX4_03            | 0.337 | 0.004   | 3.788 | 1.53E-04 | 4.40E-03  | 0.536  | 1.26 | 2.17       |
| GGARNTKYCCA_UNKNOWN   | 0.336 | -0.014  | 3.780 | 1.58E-04 | 4.40E-03  | 0.508  | 1.26 | 2.17       |
| V\$HOXA3_01           | 0.326 | -0.047  | 3.663 | 2.50E-04 | 6.68E-03  | 0.083  | 1.25 | 2.12       |
| V\$ELK1_02            | 0.320 | -0.044  | 3.602 | 3.17E-04 | 7.51E-03  | -0.133 | 1.25 | 2.09       |
| V\$TAXCREB_02         | 0.320 | 0.007   | 3.602 | 3.18E-04 | 7.51E-03  | -0.136 | 1.25 | 2.09       |
| V\$ATF1_Q6            | 0.319 | -0.022  | 3.588 | 3.34E-04 | 7.60E-03  | -0.182 | 1.25 | 2.09       |

|                          |       |        |       |          |          |        |      |      |
|--------------------------|-------|--------|-------|----------|----------|--------|------|------|
| KRCTCNNNNMANAGC_UNKNOWN  | 0.317 | -0.036 | 3.559 | 3.74E-04 | 7.82E-03 | -0.284 | 1.25 | 2.07 |
| YGTCCTTGR_UNKNOWN        | 0.314 | -0.042 | 3.525 | 4.25E-04 | 7.82E-03 | -0.401 | 1.24 | 2.06 |
| V\$E2F_Q6                | 0.312 | -0.084 | 3.508 | 4.53E-04 | 7.88E-03 | -0.459 | 1.24 | 2.05 |
| SGCGSSAAA_V\$E2F1DP2_01  | 0.312 | -0.104 | 3.503 | 4.62E-04 | 7.88E-03 | -0.478 | 1.24 | 2.05 |
| TCCCRNNRTGC_UNKNOWN      | 0.310 | -0.048 | 3.487 | 4.91E-04 | 8.15E-03 | -0.533 | 1.24 | 2.04 |
| V\$AP1_Q6                | 0.308 | -0.017 | 3.459 | 5.45E-04 | 8.81E-03 | -0.628 | 1.24 | 2.03 |
| RYTGCNRRGNAAC_V\$MIF1_01 | 0.306 | -0.050 | 3.435 | 5.95E-04 | 9.37E-03 | -0.708 | 1.24 | 2.02 |
| SCGGAAGY_V\$ELK1_02      | 0.302 | -0.041 | 3.392 | 6.96E-04 | 1.07E-02 | -0.850 | 1.23 | 2.00 |
| V\$AP1FJ_Q2              | 0.295 | -0.016 | 3.317 | 9.13E-04 | 1.37E-02 | -1.097 | 1.23 | 1.97 |
| TGACGTCA_V\$ATF3_Q6      | 0.283 | -0.047 | 3.182 | 1.47E-03 | 2.14E-02 | -1.525 | 1.22 | 1.92 |
| V\$AP1_01                | 0.282 | -0.012 | 3.176 | 1.50E-03 | 2.14E-02 | -1.545 | 1.22 | 1.92 |
| V\$CREBP1CJUN_01         | 0.282 | -0.045 | 3.167 | 1.54E-03 | 2.15E-02 | -1.571 | 1.22 | 1.91 |
| V\$NRF2_Q4               | 0.280 | -0.043 | 3.144 | 1.67E-03 | 2.19E-02 | -1.643 | 1.21 | 1.90 |
| V\$NRF1_Q6               | 0.278 | -0.033 | 3.128 | 1.76E-03 | 2.25E-02 | -1.690 | 1.21 | 1.90 |
| V\$GATA2_01              | 0.276 | -0.041 | 3.106 | 1.90E-03 | 2.38E-02 | -1.758 | 1.21 | 1.89 |
| V\$MIF1_01               | 0.276 | -0.039 | 3.099 | 1.94E-03 | 2.39E-02 | -1.778 | 1.21 | 1.89 |
| V\$NFY_Q6_01             | 0.273 | -0.060 | 3.071 | 2.14E-03 | 2.56E-02 | -1.865 | 1.21 | 1.88 |
| V\$E2F1DP1_01            | 0.272 | -0.100 | 3.056 | 2.25E-03 | 2.56E-02 | -1.909 | 1.21 | 1.87 |
| V\$E2F1DP2_01            | 0.272 | -0.100 | 3.056 | 2.25E-03 | 2.56E-02 | -1.909 | 1.21 | 1.87 |
| V\$E2F4DP2_01            | 0.272 | -0.100 | 3.056 | 2.25E-03 | 2.56E-02 | -1.909 | 1.21 | 1.87 |
| CCGNMNNNTACG_UNKNOWN     | 0.271 | -0.079 | 3.048 | 2.31E-03 | 2.58E-02 | -1.933 | 1.21 | 1.87 |
| MCAATNNNNNGCG_UNKNOWN    | 0.269 | 0.000  | 3.018 | 2.55E-03 | 2.74E-02 | -2.020 | 1.20 | 1.86 |
| V\$GABP_B                | 0.267 | -0.054 | 3.003 | 2.68E-03 | 2.84E-02 | -2.066 | 1.20 | 1.85 |
| V\$PAX3_B                | 0.266 | -0.024 | 2.990 | 2.79E-03 | 2.90E-02 | -2.102 | 1.20 | 1.85 |
| V\$E2F4DP1_01            | 0.266 | -0.101 | 2.986 | 2.83E-03 | 2.90E-02 | -2.116 | 1.20 | 1.84 |
| V\$E2F_01                | 0.263 | -0.064 | 2.953 | 3.16E-03 | 3.09E-02 | -2.212 | 1.20 | 1.83 |
| TGASTMAGC_V\$NFE2_01     | 0.262 | -0.032 | 2.949 | 3.20E-03 | 3.09E-02 | -2.222 | 1.20 | 1.83 |
| RCGCANGCGY_V\$NRF1_Q6    | 0.262 | -0.037 | 2.945 | 3.24E-03 | 3.09E-02 | -2.234 | 1.20 | 1.83 |
| V\$STAT1_02              | 0.262 | -0.057 | 2.941 | 3.28E-03 | 3.09E-02 | -2.247 | 1.20 | 1.83 |
| CGTSACG_V\$PAX3_B        | 0.261 | -0.028 | 2.936 | 3.33E-03 | 3.09E-02 | -2.259 | 1.20 | 1.82 |
| GCTNWTGK_UNKNOWN         | 0.261 | -0.020 | 2.936 | 3.33E-03 | 3.09E-02 | -2.260 | 1.20 | 1.82 |
| AAGWWRNYGGC_UNKNOWN      | 0.261 | -0.032 | 2.932 | 3.38E-03 | 3.09E-02 | -2.271 | 1.20 | 1.82 |
| TGACCTTG_V\$SF1_Q6       | 0.260 | -0.065 | 2.924 | 3.47E-03 | 3.13E-02 | -2.295 | 1.20 | 1.82 |
| V\$NFE2_01               | 0.259 | -0.030 | 2.912 | 3.60E-03 | 3.14E-02 | -2.329 | 1.20 | 1.82 |
| V\$TITF1_Q3              | 0.259 | -0.020 | 2.911 | 3.61E-03 | 3.14E-02 | -2.331 | 1.20 | 1.82 |
| V\$RFX1_01               | 0.259 | -0.057 | 2.909 | 3.63E-03 | 3.14E-02 | -2.336 | 1.20 | 1.81 |
| CACGTG_V\$MYC_Q2         | 0.257 | -0.024 | 2.890 | 3.86E-03 | 3.23E-02 | -2.390 | 1.20 | 1.81 |
| MGGAAGTG_V\$GABP_B       | 0.257 | -0.069 | 2.886 | 3.91E-03 | 3.23E-02 | -2.401 | 1.19 | 1.81 |
| V\$HEN1_01               | 0.256 | 0.030  | 2.880 | 3.98E-03 | 3.23E-02 | -2.419 | 1.19 | 1.80 |
| V\$ROAZ_01               | 0.256 | -0.084 | 2.876 | 4.04E-03 | 3.23E-02 | -2.431 | 1.19 | 1.80 |
| V\$E2F_Q3                | 0.256 | -0.078 | 2.875 | 4.05E-03 | 3.23E-02 | -2.434 | 1.19 | 1.80 |
| V\$ARNT_02               | 0.255 | -0.041 | 2.870 | 4.12E-03 | 3.24E-02 | -2.448 | 1.19 | 1.80 |
| V\$COMP1_01              | 0.254 | -0.030 | 2.860 | 4.24E-03 | 3.25E-02 | -2.474 | 1.19 | 1.80 |
| AACWWCAANK_UNKNOWN       | 0.254 | -0.007 | 2.860 | 4.24E-03 | 3.25E-02 | -2.474 | 1.19 | 1.80 |
| V\$USF_Q6_01             | 0.253 | -0.043 | 2.841 | 4.51E-03 | 3.38E-02 | -2.528 | 1.19 | 1.79 |
| V\$NRF2_01               | 0.251 | -0.054 | 2.820 | 4.81E-03 | 3.52E-02 | -2.585 | 1.19 | 1.78 |
| V\$MZF1_01               | 0.250 | -0.011 | 2.806 | 5.02E-03 | 3.63E-02 | -2.624 | 1.19 | 1.78 |
| V\$WHN_B                 | 0.249 | -0.003 | 2.797 | 5.16E-03 | 3.68E-02 | -2.648 | 1.19 | 1.77 |

|                      |       |        |       |          |          |        |      |      |
|----------------------|-------|--------|-------|----------|----------|--------|------|------|
| V\$E2F1_Q3           | 0.247 | -0.078 | 2.782 | 5.42E-03 | 3.82E-02 | -2.691 | 1.19 | 1.77 |
| AACYNNNTTCCS_UNKNOWN | 0.245 | -0.032 | 2.750 | 5.97E-03 | 4.12E-02 | -2.775 | 1.18 | 1.76 |
| V\$BRN2_01           | 0.244 | -0.031 | 2.743 | 6.10E-03 | 4.16E-02 | -2.796 | 1.18 | 1.75 |
| V\$SREBP1_01         | 0.241 | -0.065 | 2.714 | 6.65E-03 | 4.49E-02 | -2.871 | 1.18 | 1.74 |
| V\$AP1_Q2            | 0.241 | -0.031 | 2.704 | 6.85E-03 | 4.57E-02 | -2.898 | 1.18 | 1.74 |
| GCCATNTTG_V\$YY1_Q6  | 0.240 | -0.051 | 2.695 | 7.04E-03 | 4.63E-02 | -2.921 | 1.18 | 1.74 |
| V\$E2F1_Q6           | 0.240 | -0.082 | 2.693 | 7.09E-03 | 4.63E-02 | -2.928 | 1.18 | 1.74 |
| TTCYRGAA_UNKNOWN     | 0.237 | -0.005 | 2.668 | 7.64E-03 | 4.94E-02 | -2.993 | 1.18 | 1.73 |
| RNGTGGGC_UNKNOWN     | 0.236 | -0.015 | 2.655 | 7.93E-03 | 4.98E-02 | -3.026 | 1.18 | 1.72 |
| GTGACGY_V\$E4F1_Q6   | 0.236 | -0.034 | 2.655 | 7.93E-03 | 4.98E-02 | -3.026 | 1.18 | 1.72 |
| V\$SF1_Q6            | 0.236 | -0.022 | 2.655 | 7.95E-03 | 4.98E-02 | -3.028 | 1.18 | 1.72 |

**Supplemental Table 6 Transcription factor target gene sets (MSigDB, c3.tft) with negative enrichment.**  
GSVA analysis, adj P val  $\leq$  0.05.

|                        | logFC  | AveExpr | t      | P.Value  | adj.P.Val | B      |
|------------------------|--------|---------|--------|----------|-----------|--------|
| RGTTAMWNATT_V\$HNF1_01 | -0.529 | 0.014   | -5.945 | 2.85E-09 | 8.74E-07  | 10.788 |
| V\$STAT3_01            | -0.483 | -0.030  | -5.430 | 5.75E-08 | 1.18E-05  | 7.929  |
| V\$HNF1_01             | -0.375 | 0.040   | -4.218 | 2.49E-05 | 1.70E-03  | 2.217  |
| V\$ALX4_01             | -0.351 | 0.028   | -3.944 | 8.07E-05 | 3.10E-03  | 1.126  |
| V\$LMO2COM_02          | -0.321 | 0.029   | -3.605 | 3.14E-04 | 7.51E-03  | -0.124 |
| CAGNYGKNAAA_UNKNOWN    | -0.317 | -0.047  | -3.568 | 3.62E-04 | 7.82E-03  | -0.254 |
| V\$HNF1_C              | -0.315 | 0.037   | -3.544 | 3.95E-04 | 7.82E-03  | -0.335 |
| V\$HNF1_Q6             | -0.314 | 0.052   | -3.529 | 4.18E-04 | 7.82E-03  | -0.387 |
| V\$PAX8_01             | -0.313 | 0.004   | -3.523 | 4.28E-04 | 7.82E-03  | -0.408 |
| V\$PAX5_02             | -0.313 | -0.038  | -3.520 | 4.33E-04 | 7.82E-03  | -0.418 |
| V\$HNF4_Q6             | -0.281 | -0.034  | -3.159 | 1.59E-03 | 2.16E-02  | -1.595 |
| V\$CEBP_Q3             | -0.280 | 0.003   | -3.147 | 1.65E-03 | 2.19E-02  | -1.633 |
| YRCCAKNNGNCGC_UNKNOWN  | -0.269 | 0.022   | -3.025 | 2.49E-03 | 2.73E-02  | -2.000 |
| V\$AHRARNT_02          | -0.256 | -0.031  | -2.878 | 4.01E-03 | 3.23E-02  | -2.425 |
| V\$RORA2_01            | -0.253 | -0.017  | -2.842 | 4.49E-03 | 3.38E-02  | -2.525 |
| V\$GATA_C              | -0.252 | -0.012  | -2.831 | 4.65E-03 | 3.44E-02  | -2.556 |
| V\$HNF4_01             | -0.246 | -0.013  | -2.766 | 5.69E-03 | 3.97E-02  | -2.734 |

**Supplemental Table 7: Differential expression of NRG2 in FLHCC vs adjacent normal tissue in nine tumor samples** GSEA analysis, adj P val  $\leq$  0.05.

| PATIENT | $\Delta\log_2$ |
|---------|----------------|
| 3       | 4.49           |
| 4       | 4.42           |
| 5       | 5.85           |
| 6       | 5.63           |
| 8       | 5.48           |
| 9       | 5.58           |
| 10      | 6.20           |
| 11      | 6.41           |
| 12      | 4.24           |

**Supplemental Table 8: Differentially expressed Solute Transporter genes in FLHCC vs. normal tissue.** GSEA analysis, adj P val  $\leq$  0.05.

| gene_id  | description                                                                                 | $\Delta\log_2$ | padj      | function                                                                                                                                                |
|----------|---------------------------------------------------------------------------------------------|----------------|-----------|---------------------------------------------------------------------------------------------------------------------------------------------------------|
| SLC16A14 | solute carrier family 16, member 14                                                         | 7.43           | 3.69E-142 | monocarboxylic acid                                                                                                                                     |
| SLC6A3   | solute carrier family 6 (neurotransmitter transporter), member 3                            | 6.31           | 1.22E-07  | dopamine transporter which is a member of the sodium- and chloride-dependent neurotransmitter transporter family                                        |
| SLC6A11  | solute carrier family 6 (neurotransmitter transporter), member 11                           | 5.66           | 1.66E-09  | GABA transporter phosphorylated by PKA                                                                                                                  |
| SLC22A12 | solute carrier family 22 (organic anion/urate transporter), member 12                       | 5.60           | 4.11E-05  | Urate transporter found in the kidney                                                                                                                   |
| SLC7A11  | solute carrier family 7 (anionic amino acid transporter light chain, xc- system), member 11 | 5.00           | 8.38E-51  | heteromeric Na(+)-independent anionic amino acid transport system highly specific for cystine and glutamate                                             |
| SLC22A11 | solute carrier family 22 (organic anion/urate transporter), member 11                       | 3.59           | 3.91E-08  | sodium-independent transport and excretion of organic anions in kidney and placenta                                                                     |
| SLC6A17  | solute carrier family 6 (neutral amino acid transporter), member 17                         | 3.22           | 8.19E-07  | specific transporters for neurotransmitters, amino acids, and osmolytes like betaine, taurine, and creatine                                             |
| SLC6A8   | solute carrier family 6 (neurotransmitter transporter), member 8                            | 3.14           | 1.11E-14  | Sodium- and chloride-dependent creatine transporter 1                                                                                                   |
| SLC7A5   | solute carrier family 7 (amino acid transporter light chain, L system), member 5            | 2.67           | 1.23E-17  | large neutral amino acids transporter small subunit 1                                                                                                   |
| SLC7A1   | solute carrier family 7 (cationic amino acid transporter, y+ system), member 1              | 2.44           | 6.88E-14  | Cationic amino acid transporter                                                                                                                         |
| SLC38A1  | solute carrier family 38, member 1                                                          | 2.39           | 1.04E-32  | Sodium-coupled neutral amino acid transporter 1 - essential roles in the uptake of nutrients, production of energy, chemical metabolism, detoxification |
| SLC22A15 | solute carrier family 22, member 15                                                         | 2.31           | 2.63E-07  | Probably transports organic cations By similarity                                                                                                       |
| SLC35G2  | solute carrier family 35, member G2                                                         | 2.29           | 1.22E-51  | nothing known                                                                                                                                           |
| SLC5A6   | solute carrier family 5 (sodium/multivitamin and iodide cotransporter), member 6            | 2.03           | 5.64E-08  | Sodium-dependent multivitamin transporter                                                                                                               |
| SLC7A6   | solute carrier family 7 (amino acid transporter light chain, y+L system), member 6          | 2.02           | 3.76E-17  | cationic amino acid transporter, y+ system or Y+L amino acid transporter 2                                                                              |
| SLC35C1  | solute carrier family 35 (GDP-fucose transporter), member C1                                | 2.00           | 9.89E-14  | GDP-fucose transporter 1                                                                                                                                |
| SLC52A3  | solute carrier family 52 (riboflavin transporter), member 3                                 | 1.94           | 5.15E-04  | Riboflavin transport                                                                                                                                    |
| SLC22A31 | solute carrier family 22, member 31                                                         | 1.81           | 1.12E-02  | Organic anion transporter                                                                                                                               |
| SLC4A11  | solute carrier family 4, sodium borate transporter, member 11                               | 1.78           | 2.06E-04  | bicarbonate transporters                                                                                                                                |
| SLC6A6   | solute carrier family 6 (neurotransmitter transporter), member 6                            | 1.76           | 1.50E-04  | Sodium- and chloride-dependent taurine transporter                                                                                                      |

|          |                                                                                        |      |          |                                                                                                                                                                               |
|----------|----------------------------------------------------------------------------------------|------|----------|-------------------------------------------------------------------------------------------------------------------------------------------------------------------------------|
| SLC2A5   | solute carrier family 2 (facilitated glucose/fructose transporter), member 5           | 1.73 | 3.13E-04 | fructose transporter                                                                                                                                                          |
| SLC2A1   | solute carrier family 2 (facilitated glucose transporter), member 1                    | 1.62 | 1.83E-12 | Facilitative glucose transporter                                                                                                                                              |
| SLC51B   | solute carrier family 51, beta subunit                                                 | 1.47 | 1.25E-02 | bile acid export from enterocytes into portal blood; transport radiolabeled estrone-3-sulfate                                                                                 |
| SLC44A3  | solute carrier family 44, member 3                                                     | 1.44 | 5.40E-09 | similar to choline transporters                                                                                                                                               |
| SLC7A2   | solute carrier family 7 (cationic amino acid transporter, $\gamma^+$ system), member 2 | 1.37 | 7.81E-04 | Low-affinity, high capacity permease involved in the transport of the cationic amino acids (arginine, lysine and ornithine).                                                  |
| SLC25A12 | solute carrier family 25 (aspartate/glutamate carrier), member 12                      | 1.29 | 8.18E-06 | Catalyzes the calcium-dependent exchange of cytoplasmic glutamate with mitochondrial aspartate across the mitochondrial inner membrane. May have a function in the urea cycle |
| SLC45A1  | solute carrier family 45, member 1                                                     | 1.25 | 3.29E-04 | Mediates glucose uptake along the pH gradient.                                                                                                                                |
| SLC6A9   | solute carrier family 6 (neurotransmitter transporter, glycine), member 9              | 1.18 | 6.59E-04 | Sodium- and chloride-dependent glycine transporter 1                                                                                                                          |
| SLC27A4  | solute carrier family 27 (fatty acid transporter), member 4                            | 1.18 | 2.30E-05 | Long-chain fatty acid transport protein 4                                                                                                                                     |
| SLC16A11 | solute carrier family 16, member 11                                                    | 1.17 | 9.64E-03 | Proton-linked monocarboxylate transporter. Hepatic lipid metabolism                                                                                                           |
| SLC22A5  | solute carrier family 22 (organic cation/carnitine transporter), member 5              | 1.15 | 2.57E-06 | high affinity carnitine transporter                                                                                                                                           |
| SLC35B4  | solute carrier family 35 (UDP-xylose/UDP-N-acetylglucosamine transporter), member B4   | 1.15 | 9.32E-08 | UDP-xylose and UDP-N-acetylglucosamine transporter that moves sugars into Golgi                                                                                               |
| SLC25A15 | solute carrier family 25 (mitochondrial carrier; ornithine transporter) member 15      | 1.14 | 5.27E-04 | Transports ornithine from the cytosol into the mitochondria in the urea cycle                                                                                                 |
| SLC26A7  | solute carrier family 26 (anion exchanger), member 7                                   | 1.13 | 2.72E-05 | Anion exchange transporter                                                                                                                                                    |
| SLC35E4  | solute carrier family 35, member E4                                                    | 1.12 | 1.91E-05 | A drug-metabolite transporter                                                                                                                                                 |
| SLC22A23 | solute carrier family 22, member 23                                                    | 1.09 | 8.72E-05 | A member of a family of organic ion transporters                                                                                                                              |
| SLC36A1  | solute carrier family 36 (proton/amino acid symporter), member 1                       | 1.04 | 9.68E-07 | Transport of small amino acids (e.g. glycine, alanine and proline)                                                                                                            |

**Supplemental Table 9: Different expressed *wnt* signaling pathway genes in FLHCC vs. adjacent normal tissue**

GSVA analysis, adj P val  $\leq$  0.05.

| Gene    | $\Delta\log_2$ | padj     | Description                                                               |
|---------|----------------|----------|---------------------------------------------------------------------------|
| DKK4    | 6.52           | 3.99E-19 | dickkopf WNT signaling pathway inhibitor 4                                |
| FZD10   | 6.13           | 3.08E-20 | frizzled family receptor 10                                               |
| WNT16   | 4.40           | 3.04E-03 | wingless-type MMTV integration site family, member 16                     |
| Wnt1    | 3.64           | 1.55E-01 | wingless-type MMTV integration site family, member 1                      |
| SFRP2   | 3.25           | 5.84E-03 | secreted frizzled-related protein 2                                       |
| LEF1    | 2.66           | 7.57E-12 | lymphoid enhancer-binding factor 1                                        |
| DKK1    | 2.45           | 8.83E-05 | dickkopf WNT signaling pathway inhibitor 1                                |
| PRKACA  | 2.23           | 6.55E-23 | protein kinase, cAMP-dependent, catalytic, alpha                          |
| DKK2    | 2.17           | 5.34E-05 | dickkopf WNT signaling pathway inhibitor 2                                |
| WNT9B   | 1.91           | 2.46E-02 | wingless-type MMTV integration site family, member 9B                     |
| FZD8    | 1.46           | 3.98E-06 | frizzled family receptor 8                                                |
| PLCB4   | 1.34           | 1.02E-03 | phospholipase C, beta 4                                                   |
| FZD2    | 1.32           | 4.98E-04 | frizzled family receptor 2                                                |
| CSNK2A2 | 1.31           | 5.68E-15 | casein kinase 2, alpha prime polypeptide                                  |
| SMAD2   | 1.17           | 3.32E-08 | SMAD family member 2                                                      |
| FZD6    | 1.10           | 1.09E-14 | frizzled family receptor 6                                                |
| WNT2B   | 1.02           | 2.36E-03 | wingless-type MMTV integration site family, member 2B                     |
| CTBP2   | 0.99           | 6.11E-10 | C-terminal binding protein 2                                              |
| NFATC4  | 0.93           | 6.79E-05 | nuclear factor of activated T-cells, cytoplasmic, calcineurin-dependent 4 |



Supplemental Table 10: Transcription factors log<sub>2</sub>fold-change ≥ 1 (p<0.02)

| Transcription Factor                                                | Gene name   | ΔLog <sub>2</sub> | P <sub>adj</sub> |
|---------------------------------------------------------------------|-------------|-------------------|------------------|
| cAMP responsive element binding protein 3-like 1                    | CREB3L1     | 4.85              | 3.12E-27         |
| Cellular repressor of E1A-stimulated genes 2                        | CREG2       | 3.72              | 3.31E-05         |
| E2F transcription factor 1                                          | E2F1        | 1.28              | 5.47E-05         |
| E2F transcription factor 3                                          | E2F3        | 1.19              | 1.06E-08         |
| E2F transcription factor 5, p130-binding                            | E2F5        | 1.74              | 3.16E-18         |
| E2F transcription factor 7                                          | E2F7        | 1.67              | 1.10E-04         |
| E2F transcription factor 8                                          | E2F8        | 2.07              | 4.26E-07         |
| early B-cell factor 2                                               | EBF2        | 3.22              | 2.99E-08         |
| ETS Variant gene 1                                                  | ETV1        | 1.85              | 3.35E-10         |
| forkhead box C1                                                     | FOXC1       | 1.31              | 1.39E-05         |
| forkhead box C2 (MFH-1, mesenchyme forkhead 1)                      | FOXC2       | 1.78              | 1.26E-02         |
| forkhead box E1 (thyroid transcription factor 2)                    | FoxE1       | 4.2               | 2.3E-03          |
| forkhead box F2                                                     | FoxF2       | 3.39              | 4.33E-06         |
| forkhead box L1                                                     | FoxL1       | 2.13              | 4.46E-05         |
| forkhead box Q1                                                     | FoxQ1       | 3.91              | 8.95E-15         |
| forkhead box S1                                                     | FoxS1       | 2.01              | 4.63E-05         |
| general transcription factor IIE, polypeptide 1, alpha 56kDa        | GTF2E1      | 1.01              | 1.29E-05         |
| homeobox D1                                                         | HOXD1       | 3.69              | 3.84e-03         |
| homeobox D3                                                         | HOXD3       | 2.58              | 2.42E-06         |
| homeobox D9                                                         | HOXD9       | 3.62              | 1.18E-07         |
| heat shock transcription factor 4                                   | HSF4        | 1.63              | 8.46E-09         |
| Iroquois homeobox protein 3                                         | IRX3        | 3.23              | 2.66E-05         |
| iroquois homeobox 5                                                 | IRX5        | 4.69              | 5.11E-06         |
| maternal embryonic leucine zipper kinase                            | MELK        | 2.51              | 6.65E-15         |
| neuronal PAS domain protein 2                                       | NPAS2       | 2.75              | 5.49E-11         |
| Paired-like homeodomain transcription factor 1                      | PITX1       | 4.69              | 2.29E-10         |
| PR domain containing 7                                              | PRDM7       | 2.45              | 0.0012           |
| paired related homeobox 1                                           | PRRX1       | 3.12              | 4.36E-09         |
| runt-related transcription factor 1                                 | RUNX1       | 1.12              | 4.10E-4          |
| Scm-like with four mbt domains 2                                    | SFMBT2      | 2.53              | 1.10E-10         |
| SIX homeobox 1                                                      | SIX1        | 6.96              | 8.50E-09         |
| SIX homeobox 2                                                      | SIX2        | 5.10              | 9.19E-3          |
| SIX homeobox 4                                                      | SIX4        | 2.45              | 6.71E-07         |
| SRY (sex determining region Y)-box 11                               | SOX11       | 5.86              | 2.68E-07         |
| Sp6 transcription factor                                            | SP6         | 1.52              | 2.32e-04         |
| SPOC domain containing 1                                            | SPOCD1      | 2.76              | 5.32E-08         |
| transcription factor 23                                             | TCF23       | 4.33              | 3.00E-09         |
| transducin-like enhancer of split 6 (E(sp1) homolog, Drosophila)    | TLE6        | 3.44              | 5.71E-35         |
| ventral anterior homeobox 2                                         | VAX2        | 3.38              | 1.46E-05         |
| visual system homeobox 1                                            | VSX1        | 3.23              | 2.73E-07         |
| zinc finger, MYND-type containing 15 [Source:HGNC Symbol;Acc:20997] | ZMYND1<br>5 | 1.95              | 1.18E-14         |
| zinc finger protein 233                                             | ZNF233      | 3.19              | 9.52E-17         |
| zinc finger protein 703                                             | ZNF703      | 3.58              | 3.24E-24         |

Supplemental Table 11: Transcription factors that are decreased by > 2-fold ( $p < 0.02$ )

| Gene                                                                | Gene Name | $\Delta\text{Log}_2$ | Padj        |
|---------------------------------------------------------------------|-----------|----------------------|-------------|
| activating transcription factor 3                                   | ATF3      | -1.56                | 1.52E-06    |
| activating transcription factor 5                                   | ATF5      | -1.55                | 6.485E-04   |
| activating transcription factor 7 interacting protein 2             | ATF7IP2   | -1.18                | 1.42E-09    |
| BTB and CNC homology 1, basic leucine zipper transcription factor 2 | BACH2     | -1.43                | 4.84E-06    |
| E74-like factor 5 (ets domain transcription factor)                 | ELF5      | -4.33                | 1.55e-4     |
| forkhead box A2                                                     | FOXA2     | -1.11                | 9.57E-06    |
| forkhead box A3                                                     | FOXA3     | -2.28                | 5.28E-16    |
| forkhead box D3                                                     | FOXD3     | -4.47                | 1.09E-03    |
| growth factor independent 1B transcription repressor                | GFI1B     | -3.79                | 2.47E-03    |
| rippy transcriptional repressor 1                                   | RIPPLY1   | -1.22                | 5.20E-03    |
| rippy transcriptional repressor 3                                   | RIPPLY3   | -2.42                | 6.28E-03    |
| Spi-B transcription factor (Spi-1/PU.1 related)                     | SPIB      | -1.94                | 0.01049661  |
| Spi-C transcription factor (Spi-1/PU.1 related)                     | SPIC      | -4.00                | 1.26E-09    |
| transcription elongation factor A (SII), 3                          | TCEA3     | -2.24                | 4.89E-06    |
| transcription elongation factor A (SII)-like 2                      | TCEAL2    | -3.96                | 0.001997562 |
| transcription elongation factor A (SII)-like 7                      | TCEAL7    | -1.34                | 0.016655587 |
| transcription factor 21                                             | TCF21     | -2.23                | 2.23E-03    |
| transcription factor 7-like 1 (T-cell specific, HMG-box)            | TCF7L1    | -1.05                | 6.36E-03    |

Supplemental Table 12: Transcripts differentially expressed in FLHCC correlated with Kegg Cancer Pathways sets

Among gene sets from the “Canonical Pathways” collection in the Molecular Signatures Database (Broad institute, c2.cp), found to be differentially enriched (GSVA, FDR 0.05) in FL-HCC versus normal tissue were three “cancer sets” from the KEGG collection: bladder cancer, pancreatic cancer and small cell lung cancer.

| Pathway                         | logFC | Ave Expr | t     | P.Value | Adj P.Val | B     |
|---------------------------------|-------|----------|-------|---------|-----------|-------|
| KEGG_BLADDER_CANCER             | 0.47  | -0.03    | 3.88  | 0.00    | 0.00      | -0.26 |
| KEGG_PANCREATIC_CANCER          | 0.34  | -0.04    | 2.67  | 0.01    | 0.04      | -3.43 |
| KEGG_SMALL_CELL_LUNG_CANCER     | 0.32  | -0.01    | 2.62  | 0.01    | 0.04      | -3.54 |
| KEGG_PROSTATE_CANCER            | 0.28  | -0.03    | 2.30  | 0.03    | 0.08      | -4.23 |
| KEGG_CHRONIC_MYELOID_LEUKEMIA   | 0.27  | -0.06    | 2.12  | 0.04    | 0.10      | -4.60 |
| KEGG_GLIOMA                     | 0.20  | -0.05    | 1.64  | 0.11    | 0.22      | -5.44 |
| KEGG_PATHWAYS_IN_CANCER         | 0.19  | -0.04    | 1.61  | 0.12    | 0.22      | -5.49 |
| KEGG_ENDOMETRIAL_CANCER         | 0.19  | -0.08    | 1.56  | 0.13    | 0.24      | -5.56 |
| KEGG_COLORECTAL_CANCER          | 0.14  | -0.06    | 1.08  | 0.29    | 0.44      | -6.18 |
| KEGG_NON_SMALL_CELL_LUNG_CANCER | 0.13  | -0.07    | 1.01  | 0.32    | 0.47      | -6.25 |
| KEGG_MELANOMA                   | 0.12  | -0.04    | 0.98  | 0.33    | 0.48      | -6.28 |
| KEGG_THYROID_CANCER             | 0.12  | -0.08    | 0.91  | 0.37    | 0.52      | -6.34 |
| KEGG_RENAL_CELL_CARCINOMA       | 0.08  | -0.05    | 0.65  | 0.52    | 0.65      | -6.54 |
| KEGG_BASAL_CELL_CARCINOMA       | 0.05  | 0.02     | 0.42  | 0.68    | 0.77      | -6.67 |
| KEGG_ACUTE_MYELOID_LEUKEMIA     | 0.00  | -0.03    | -0.02 | 0.98    | 0.99      | -6.76 |

**Supplemental Table 13: Transcripts increased in expression in FLHCC that have been implicated in breast cancer.**

| Gene                                                                | Gene Name | DLog <sub>2</sub> | Padj      | notes                                                                                         |
|---------------------------------------------------------------------|-----------|-------------------|-----------|-----------------------------------------------------------------------------------------------|
| v-erb-b2 avian erythroblastic leukemia viral oncogene homolog 2     | ERBB2     | 2.15              | 6.44E-34  | Increased in 30% of breast cancers (14)                                                       |
| ZNF703                                                              | ZNF703    | 3.58              | 3.24E-24  | a luminal B breast cancer oncogene (15)                                                       |
| Aurora Kinase A                                                     | AURKA     | 2.65              | 3.52E-18  | Determinant of tamoxifen resistance through phosphorylation of ER $\alpha$ (16)               |
| breast cancer anti-estrogen resistance 1                            | BCAR1     | 1.00              | 7.67E-08  | Important for transformation of ERBB2 in breast cancer (17)                                   |
| p21-Activated Kinase 3                                              | PAK3      | 7.91              | 2.84E-141 | PAK3 responsible for phosphorylation of ERK (18)                                              |
| cytochrome P450, family 19, subfamily A, polypeptide 1 (aromatase ) | CYP19A1   | 5.95              | 4.25E-26  | A driver for some forms of breast cancer (19)                                                 |
| platelet isoform of phosphofructokinase                             | PFKP      | 3.09              | 8.31E-15  | Drives the proliferation of breast tumors (20)                                                |
| Lactate dehydrogenase B                                             | LDHB      | 2.25              | 7.19E-17  | Essential for triple-negative breast cancer (21)                                              |
| Jagged-1                                                            | JAG1      | 1.19              | 9.31E-07  | poor prognosis in breast cancer (22)                                                          |
| iroquois homeobox 5                                                 | IRX5      | 4.69              | 5.11E-06  | Increased in breast cancer (23)                                                               |
| neuronal PAS domain protein 2                                       | NPAS2     | 2.75              | 5.49E-11  | Prognostic for breast cancer (24)                                                             |
| Paired-like homeodomain transcription factor 1                      | PITX1     | 4.69              | 2.29E-10  | Upregulated in ER-positive breast cancer (low in prostate, bladder and colon tumor lines (25) |

**Supplemental Table 14: Comparison with previous reports on FLHCC**

| Protein                                                                                | Gene             | $\Delta$ Log <sub>2</sub> | pAdj      | Reference                                                                                    |
|----------------------------------------------------------------------------------------|------------------|---------------------------|-----------|----------------------------------------------------------------------------------------------|
| anterior gradient 2                                                                    | AGR2             | 7.77                      | 1.27E-37  | Reported increased: (26)                                                                     |
| CD44 molecule (Indian blood group)                                                     | CD44             | NS                        | NS        | Reported increased: (27)                                                                     |
| CD68                                                                                   | CD68             | NS                        | NS        | Reported increased: (28)                                                                     |
| CD99 molecule                                                                          | CD99             | -0.70                     | 4.43E-03  | Reported increased: (29)                                                                     |
| cyclin-dependent kinase inhibitor 2A                                                   | CDKN2A           | 1.72                      | 5.07E-06  | Reported increased: (30)                                                                     |
| cytochrome P450, family 19, subfamily A, polypeptide 1 (aromatase – estrogen synthase) | CYP19A1          | 5.95                      | 4.25E-26  | Reported increased levels of aromatase (31-34)                                               |
| endothelin 1                                                                           | EDN1             | -1.27                     | 4.71E-05  | Reported increase: (35)                                                                      |
| endothelin 3                                                                           | EDN3             | NS                        | NS        | Reported increase: (35)                                                                      |
| Epidermal growth factor receptor                                                       | EGFR             | .086                      | 3.18E-03  | Reported increased in 54% of FLHCC (36); reported increased in 92% (37)and increased in (38) |
| v-erb-b2 avian erythroblastic leukemia viral oncogene homolog 2                        | ERBB2            | 2.15                      | 6.44E-34  |                                                                                              |
| fibrinogen alpha chain                                                                 | FGA              | 0.78                      | 7.17E-03  | Reported increased: (39) (40)                                                                |
| fibrinogen beta chain                                                                  | FGB              | 0.58                      | 1.10E-01  | Reported increased: (39) (40)                                                                |
| glypican 3                                                                             | GPC3             | NS                        | NS        | Reported increased: (41)                                                                     |
| P21Ras                                                                                 | hras, nras, kras | NS                        | NS        | Reported increased: (42)                                                                     |
| antigen identified by monoclonal antibody Ki-67                                        | MKI67            | 2.89                      | 5.80E-12  | (30)                                                                                         |
| neurotensin                                                                            | NTS              | 7.55                      | 1.67E-26  | Reported increased: (43) (44) (45)                                                           |
| proprotein convertase subtilisin/kexin type 1                                          | PCSK1            | 10.64                     | 4.20E-100 | Reported increased: (46)                                                                     |
| peroxisome proliferator-activated receptor gamma                                       | PPARG            | -0.719                    | 5.73E-04  | Reported absent: (27)                                                                        |
| prominin 1                                                                             | PROM1            | -2.97                     | 3.86E-05  | Reported increased: (27)                                                                     |
| transcobalamin I (vitamin B12 binding protein, R binder family)                        | TCN1             | 3.98                      | 7.67E-08  | Reported increased: (47) (48) (49)                                                           |
| transforming growth factor, beta 1                                                     | TGFB1            | -0.151                    | 5.76E-01  | Reported increased: (50)                                                                     |

**Supplemental Table 15: Primers used for qPCR**

|                   | Forward Primer     | Reverse Primer       |
|-------------------|--------------------|----------------------|
| PRKACA (exon 8-9) | GCCCTGGGGTCTTATCTA | AGCTGAAGTGGGAAGGGAAG |
| DNAJB1 (exon 2-3) | ACCTCAACAACATCCAGC | AGTGGGACGTTCACTGTG   |
